# Supplementary material for: Influence of Interface Modification on the Moisture Absorption and Thermal Resistance of Ramie Fiber/Degradable Epoxy Composites
Source: MDPI journal article supplement (doi:10.3390/ma17081779), 2024-04-12
Supplement: s1 [file s1]

# Influence of Interface Modification on the Moisture Absorption and Thermal Resistance of Ramie Fiber/Degradable Epoxy Composites

Jingqi Geng and Yingchun Cai\*

Key Laboratory of Bio-Based Material Science and Technology, Ministry of Education, School of Material Science and Engineering, Northeast Forestry University, Harbin 150040, China;

\*Correspondence: caiyingchun@nefu.edu.cn

**Table S1.** Maximum water content ( $M_m$ ) and diffusivity ( $D$ ) of different composites at room temperature.

| Sample   | $M_m$ (%) | $D$ ( $10^{-12}$ m <sup>2</sup> /s) |
|----------|-----------|-------------------------------------|
| F-CN-DEP | 25.98     | 21.68                               |
| F-OH-DEP | 24.36     | 14.31                               |
| F-Si-DEP | 15.71     | 13.48                               |

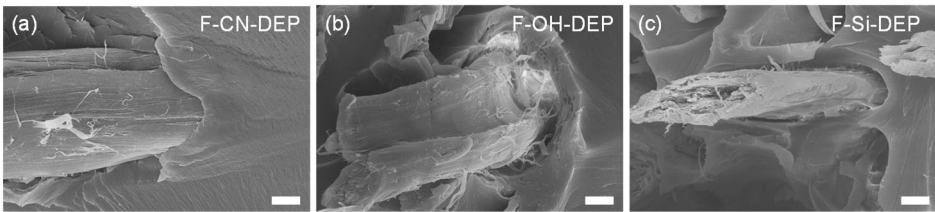

**Figure S1.** Maximum water content ( $M_m$ ) and diffusivity ( $D$ ) of different composites at room temperature.

1

(1) Saikia, D. Studies of water absorption behavior of plant fibers at different temperatures. *International Journal of Thermophysics* **2010**, 31 (4), 1020-1026.
